# Supplementary material for: Ubiquitination of HLA-DO by MARCH family E3 ligases
Source: PubMed Central journal article supplement (PMC3655539; doi:10.1002/eji.201243043), 2013-02-11
Supplement: eji0043-1153-SD1.pdf [file eji0043-1153-SD1.pdf]

Supplemental Figure 1. **Lysine residues are conserved in the cytoplasmic tail of mammalian DO $\beta$  molecules.**

Amino acid sequences of the cytoplasmic tails of the homologues of HLA-DO $\alpha$  and  $\beta$  from 24 mammals are shown. The ubiquitination site at the residue corresponding to human DO $\beta$  lysine 225 is conserved across most mammalian species. The C-terminal parts of the putative transmembrane domains are highlighted in grey, lysine residues are shown in red, and Yxx $\Phi$  and dileucine motifs are in bold print. Sequences were obtained from the Ensemble database, Release 62. All species for which both  $\alpha$  and  $\beta$  chains were available are shown. In orangutan, mouse lemur, horse, dog and elephant, the DO $\beta$  STOP codon was not found in the database (...).

| Species                | Species name                         | DO $\alpha$                                          | DO $\beta$                                                                                                     |
|------------------------|--------------------------------------|------------------------------------------------------|----------------------------------------------------------------------------------------------------------------|
| Human                  | <i>Homo sapiens</i>                  | ...LVGTVLIIMGTIVSSVPR                                | ...LVGIVIQLR <b>AQ</b> K <b>GYVRT</b> QMSGNEVSRAV <b>LL</b> PQSC                                               |
| Chimpanzee             | <i>Pan troglodytes</i>               | ...LVGTVLIIVGTIVSSVPR                                | ...LVGIVIQLR <b>AQ</b> K <b>GYVRT</b> QMSGNEVSRAV <b>LL</b> PQSC                                               |
| Orang Utan             | <i>Pongo pygmaeus</i>                | ...LVGTVLIIMGTIVSSARR                                | ...LVGIVIQLR <b>AQ</b> K <b>GYVRT</b> QMSGNEVSRAV <b>LL</b> PQ [...]                                           |
| Macaque                | <i>Macaca mulatta</i>                | ...LVGTILIIIMGTIVSSAPR                               | ...LMGIIIQLR <b>AQ</b> K <b>GYVRT</b> QMSGDEVSRAV <b>LL</b> PQPC                                               |
| Marmoset               | <i>Callithrix jacchus</i>            | ...LVGTILIIIMGICVSSAPR                               | ...LVGIVIQLR <b>AQ</b> KGHVGTMSGDEVSRAV <b>LL</b> PQSY                                                         |
| Galago                 | <i>Otolemur garnettii</i>            | ...LVGTILII <b>K</b> GT <b>CQ</b> SSAPR              | ...LVGIVIH <b>LR</b> AQ <b>KGYMEIQ</b> KSGDEVSRAV <b>LF</b> PQPH                                               |
| Mouse Lemur            | <i>Microcebus murinus</i>            | ...LVGTALVITGTRLSSAPGQ                               | ...LLLVGVL <b>LR</b> RAQR [...]                                                                                |
| Tarsier                | <i>Tarsius syrichta</i>              | ...LVGTILIIIRGT <b>C</b> ESHAPR                      | ...LVGIVIH <b>LR</b> AR <b>KGYMDT</b> Q <b>Q</b> SGDEVPRTVMPWQPC                                               |
| Large Flying Fox       | <i>Pteropus vampyrus</i>             | ...LVGTVLIITSTCLHSAPR                                | ...LVGI <b>AV</b> HLRAQ <b>KGYAET</b> QLSGD <b>KV</b> SR <b>SV</b> LPPLTY                                      |
| Pika                   | <i>Ochotona princeps</i>             | ...LQGTVLII <b>I</b> AT <b>RM</b> SRAPRQ             | ...LVGII <b>TY</b> LR <b>AW</b> KGCMETQ <b>RS</b> AAEVSRAG <b>F</b> PSQPY                                      |
| Mouse                  | <i>Mus musculus</i>                  | ...LLGTVLMITGTRRPSIRR                                | ...LVGV <b>VI</b> HL <b>KAQ</b> KASVETQ-PGNEAS <b>RES</b> LHSQP.                                               |
| Rat                    | <i>Rattus norvegicus</i>             | ...LLGTLLMVTATRMPSTRR                                | ...LVG <b>AV</b> IH <b>LR</b> KAQKASVETQ-PGNEAS <b>R</b> ALLPPHPY                                              |
| Kangaroo Rat           | <i>Dipodomys ordii</i>               | ...LMGTILII <b>I</b> LAT <b>TM</b> DAHR              | ...LAG <b>LI</b> IHL <b>RAW</b> KGS <b>AE</b> AQ-AGHEVSR <b>ALL</b> PSQPY                                      |
| Ground Squirrel        | <i>Spermophilus tridecemlineatus</i> | ...LMGTILII <b>I</b> TG <b>TC</b> MSSCPR             | ...LVGII <b>I</b> HL <b>R</b> AR <b>KGS</b> VETQ-SGD <b>KISRA</b> IL <b>Q</b> PN <b>S</b>                      |
| Horse                  | <i>Equus caballus</i>                | ...LVGTILLII <b>I</b> STCLSGAPR                      | ...LVGIF <b>I</b> HL <b>R</b> AR <b>KG</b> [...]                                                               |
| Pig                    | <i>Sus scrofa</i>                    | ...LVGVTLII <b>T</b> GRRR <b>SS</b> SPR              | ...LVGII <b>I</b> H <b>V</b> RRAR <b>KGR</b> VETQLSGDEPH                                                       |
| Alpaca                 | <i>Vicugna pacos</i>                 | ...LVGIVLII <b>T</b> GSRLSRAPR                       | ...LVGIT <b>V</b> HVRAR <b>KGYVET</b> QLSGD <b>KV</b> L <b>GA</b> VCPEQPH                                      |
| Bottlenose Dolphin     | <i>Tursiops truncatus</i>            | ...LVGVILII <b>T</b> GTCLSS <b>TP</b> R              | ...LVGIV <b>I</b> H <b>T</b> RRAR <b>KM</b> -----VTVPRAV <b>LR</b> PQPH                                        |
| Dog                    | <i>Canis lupus</i>                   | ...LVGTIFII <b>R</b> GTCLSSG <b>PR</b> YRG <b>PQ</b> | ...LVGT <b>VI</b> CLRAQ <b>KGYVET</b> Q <b>F</b> SGDEVM [...]                                                  |
| Cat                    | <i>Felis catus</i>                   | ...LVGFLVG <b>T</b> ILII <b>R</b> GTCLSSAPR          | ...LVGT <b>VI</b> CLRAQ <b>KGYMET</b> QLSGDEVSRAV-PSP <b>PH</b>                                                |
| Nine-Banded Armadillo  | <i>Dasypus novemcinctus</i>          | ...LAGLVGT <b>IL</b> IFAG <b>TR</b> LSSAPR           | ...LVGII <b>I</b> CL <b>R</b> AR <b>KGYMET</b> QLSN <b>D</b> GVSR <b>ALL</b> PPQLYQ                            |
| African Elephant       | <i>Loxodonta africana</i>            | ...LVGTIFII <b>S</b> GTCLSS <b>TP</b> RCRG <b>PR</b> | ...LVGIV <b>I</b> H <b>F</b> RG <b>Q</b> KG [...]                                                              |
| Hyrax                  | <i>Procavia capensis</i>             | ...LVGTIFII <b>S</b> GAC <b>L</b> SS <b>DP</b> K     | ...LVGIF <b>I</b> Y <b>F</b> RAQ <b>KGYVKT</b> QL <b>S</b> VD <b>KV</b> SR <b>SV</b> LP <b>PQ</b> PYE          |
| Lesser Hedgehog Tenrec | <i>Echinops telfairi</i>             | ...LLGTVLI <b>I</b> H <b>S</b> TCC <b>SS</b> VLR     | ...LVG <b>I</b> C <b>IR</b> LR <b>KA</b> QR <b>GH</b> VET <b>P</b> QL <b>H</b> DEGS <b>RS</b> V-PI <b>Q</b> SC |
