# Supplementary material for: Ubiquitination of HLA-DO by MARCH family E3 ligases
Source: PubMed Central journal article supplement (PMC3655539; doi:10.1002/eji.201243043), 2013-02-11
Supplement: eji0043-1153-SD2.pdf [file eji0043-1153-SD2.pdf]

# European Journal of Immunology

**Supporting Information**

**for**

**DOI 10.1002/eji.201243043**

Martin Jahnke, John Trowsdale and Adrian P. Kelly

**Ubiquitination of HLA-DO by MARCH family E3 ligases**

Supplemental Figure 1. **Lysine residues are conserved in the cytoplasmic tail of mammalian DO $\beta$  molecules.**

Amino acid sequences of the cytoplasmic tails of the homologues of HLA-DO $\alpha$  and  $\beta$  from 24 mammals are shown. The ubiquitination site at the residue corresponding to human DO $\beta$  lysine 225 is conserved across most mammalian species. The C-terminal parts of the putative transmembrane domains are highlighted in grey, lysine residues are shown in red, and Yxx $\Phi$  and dileucine motifs are in bold print. Sequences were obtained from the Ensemble database, Release 62. All species for which both  $\alpha$  and  $\beta$  chains were available are shown. In orangutan, mouse lemur, horse, dog and elephant, the DO $\beta$  STOP codon was not found in the database (...).

| Species                | Species name                         | DO $\alpha$                             | DO $\beta$                                                                                   |
|------------------------|--------------------------------------|-----------------------------------------|----------------------------------------------------------------------------------------------|
| Human                  | <i>Homo sapiens</i>                  | ...LVGTVLIIIMGTIVSSVPR                  | ...LVGIVIQLR <b>AQ</b> K <b>GYVRT</b> QMSGNEVSRAV <b>LL</b> PQSC                             |
| Chimpanzee             | <i>Pan troglodytes</i>               | ...LVGTVLIIIVGTIVSSVPR                  | ...LVGIVIQLR <b>AQ</b> K <b>GYVRT</b> QMSGNEVSRAV <b>LL</b> PQSC                             |
| Orang Utan             | <i>Pongo pygmaeus</i>                | ...LVGTVLIIIMGTIVSSARR                  | ...LVGIVIQLR <b>AQ</b> K <b>GYVRT</b> QMSGNEVSRAV <b>LL</b> PQ [...]                         |
| Macaque                | <i>Macaca mulatta</i>                | ...LVGTILIIIMGTIVSSAPR                  | ...LMGIIIQLR <b>AQ</b> K <b>GYVRT</b> QMSGDEVSRAV <b>LL</b> PQPC                             |
| Marmoset               | <i>Callithrix jacchus</i>            | ...LVGTILIIIMGICVSSAPR                  | ...LVGIVIQLR <b>AQ</b> KGHVGTMSGDEVSRAV <b>LL</b> PQSY                                       |
| Galago                 | <i>Otolemur garnettii</i>            | ...LVGTILII <b>K</b> GT <b>CQ</b> SSAPR | ...LVGIVIH <b>LR</b> AQ <b>KGYMEIQ</b> KSGDEVSRAV <b>LF</b> PQPH                             |
| Mouse Lemur            | <i>Microcebus murinus</i>            | ...LVGTALVITGTRLSSAPGQ                  | ...LLLVGVL <b>LR</b> RAQR [...]                                                              |
| Tarsier                | <i>Tarsius syrichta</i>              | ...LVGTILIIIRGT <b>C</b> ESHAPR         | ...LVGIVIH <b>LR</b> AR <b>KGYMDT</b> Q <b>Q</b> SGDEVPRTVMPWQPC                             |
| Large Flying Fox       | <i>Pteropus vampyrus</i>             | ...LVGTVLIIITSTCLHSAPR                  | ...LVGI <b>AV</b> HLRAQ <b>KGYAET</b> QLSGD <b>KV</b> SR <b>SV</b> LPPLTY                    |
| Pika                   | <i>Ochotona princeps</i>             | ...LQGTVLII <b>I</b> ATRMSRAPRQ         | ...LVGII <b>TY</b> LR <b>AW</b> KGCMETQ <b>RS</b> AAEVSRAGF <b>PS</b> QPY                    |
| Mouse                  | <i>Mus musculus</i>                  | ...LLGTVLMITGTRRPSIRR                   | ...LVGVV <b>IH</b> L <b>KAQ</b> KASVETQ-PGNEASRESLHSQP.                                      |
| Rat                    | <i>Rattus norvegicus</i>             | ...LLGTLLMVTATRMPSTRR                   | ...LVG <b>AV</b> IH <b>LKAQ</b> KASVETQ-PGNEAS <b>RALL</b> PPHPY                             |
| Kangaroo Rat           | <i>Dipodomys ordii</i>               | ...LMGTILIIILATTMADAHR                  | ...LAG <b>LI</b> IHL <b>RAW</b> KGS <b>AE</b> AQ-AGHEVSR <b>ALL</b> PSQPY                    |
| Ground Squirrel        | <i>Spermophilus tridecemlineatus</i> | ...LMGTILIIITGTCMSSCPR                  | ...LVGII <b>IHL</b> RAR <b>KGS</b> VETQ-SGD <b>KISRAIL</b> Q <b>K</b> PN <b>S</b>            |
| Horse                  | <i>Equus caballus</i>                | ...LVGTILLIIITSTCLSGAPR                 | ...LVGIF <b>IHL</b> RAR <b>KG</b> [...]                                                      |
| Pig                    | <i>Sus scrofa</i>                    | ...LVGVTLIIITGRRRSSSPR                  | ...LVGII <b>I</b> HVRAR <b>KGR</b> VETQLSGDEPH                                               |
| Alpaca                 | <i>Vicugna pacos</i>                 | ...LVGIVLIIITGSRLSRAPR                  | ...LVGITVHVRAR <b>KGYVET</b> QLSGD <b>KVL</b> GAVCP <b>EQ</b> PH                             |
| Bottlenose Dolphin     | <i>Tursiops truncatus</i>            | ...LVGVILIIITGTCLSSTPR                  | ...LVGIVIHTRAR <b>KM</b> -----VTVPRAVLR <b>PQ</b> PH                                         |
| Dog                    | <i>Canis lupus</i>                   | ...LVGTIFIIIRGTCLSSGPRYRGPQ             | ...LVGTVIC <b>LR</b> AQ <b>KGYVET</b> Q <b>F</b> SGDEVM [...]                                |
| Cat                    | <i>Felis catus</i>                   | ...LVGFLVGTILIIIRGTCLSSAPR              | ...LVGTVIC <b>LR</b> AQ <b>KGYMET</b> QLSGDEVSRAV-P <b>SP</b> PH                             |
| Nine-Banded Armadillo  | <i>Dasypus novemcinctus</i>          | ...LAGLVVGTILIFAGTRLSSAPR               | ...LVGII <b>I</b> CLRAR <b>KGYMET</b> QLSN <b>DG</b> VSRA <b>LL</b> PPQLYQ                   |
| African Elephant       | <i>Loxodonta africana</i>            | ...LVGTIFIIISGTCLSSTPRCRGPR             | ...LVGIVIHFRG <b>QK</b> [...]                                                                |
| Hyrax                  | <i>Procavia capensis</i>             | ...LVGTIFIIISGACLS <b>SDPK</b>          | ...LVGIF <b>IY</b> FRAQ <b>KGYVKT</b> QL <b>SV</b> D <b>KV</b> SR <b>SV</b> LP <b>PQ</b> PYE |
| Lesser Hedgehog Tenrec | <i>Echinops telfairi</i>             | ...LLGTVLIIIHSTCCSSVLR                  | ...LVGIC <b>IRL</b> L <b>KAQ</b> RGHVET <b>PQ</b> LHDEGSRSV-PI <b>Q</b> SC                   |
